# Supplementary material for: Who Gets Included? Equity in Digital and Decentralised Mental Health and Neurodevelopmental Trials: A Systematic Review
Source: Research Square preprint supplement (doi:10.21203/rs.3.rs-7565290/v1), 2026-01-29
Supplement: Supplementary file 3 [file 68712afb358c435c6ea27244.docx]

| Table 1. Inclusion criteria based on population, intervention, comparator, outcome and study design | |
| --- | --- |
| Population | Children (aged up to 17 years) and/or adults (aged 18 years and above) with a diagnosis of a mental health or neurodevelopmental condition (as defined by the DSM-5 (38)), in any setting. |
| Intervention | Studies that described or evaluated decentralised, virtual, or remote interventions (fully or partially remote), e.g., teletherapy, app-based interventions, remote assessments. Interventions must involve assessment, treatment, prevention, or management of mental health or neurodevelopmental conditions. |
| Comparator | Studies with the following controls were considered: normal practice (‘usual care’), waiting-list control, or any other intervention described by the authors as a comparator. |
| Outcomes | Studies that reported psychological, emotional and/or behavioural outcomes (e.g., agitation, anxiety, social behaviour). |
| Study designs | Randomised controlled trials (including randomised feasibility and pilot trials). |

| Table 2. Study characteristics | | | | | | | |
| --- | --- | --- | --- | --- | --- | --- | --- |
| Author/Year | **Country** | **Participants (n)** | **Diagnosis** | **Full or hybrid remote** | **Remote recruitment strategies (Y/N)** | **Remote screening and/or eligibility (Y/N)** | **Remote assessments/**  **follow-up (Y/N)** |
| Andrews et al. (2023) | Australia | 103 | Anxiety or depression | Full | Yes | Yes | Yes |
| Backman et al. (2024) | Sweden | 141 | Autism | Full | Yes | Yes | Yes |
| Bennett et al. (2021) | UK | 34 | Any mental health condition | Hybrid | No | No | Yes |
| Bikic et al. (2018) | Denmark | 70 | ADHD | Hybrid | No | Yes | Yes |
| Bilan et al. (2025) | Spain | 49 | ADHD | Hybrid | No | Yes | No |
| Carl et al. (2020) | USA and UK | 256 | Generalised anxiety disorder | Full | Yes | Yes | Yes |
| Chan et al. (2023) | Hong Kong | 320 | Comorbid depressive disorder and insomnia | Full | Yes | Yes | Yes |
| Chien et al. (2024) | Hong Kong | 50 | Any neurodevelopmental conditions | Hybrid | Not clear | Not clear | Not clear |
| Clark et al. (2023) | UK | 102 | Social anxiety | Hybrid | No | No | Yes |
| Creswell et al. (2024) | UK | 443 | Anxiety | Hybrid | No | Yes | Yes |
| Dopfner et al. (2025) | Germany | 431 | ADHD | Hybrid | No | Yes | Yes |
| Eto et al. (2025) | Japan | 30 | ADHD | Full | Yes | Yes | Yes |
| Eylem et al. (2021) | Netherlands and UK | 18 | Suicidal ideation | Hybrid | Yes | Not clear | Yes |
| Fatouros et al. (2025) | Greece | 200 | Depression and generalised anxiety disorder | Full | Yes | Yes | Yes |
| Felder et al. (2020, 2022) | USA | 208 | Insomnia | Full | Yes | Yes | Yes |
| Grenier-Martin et al. (2022) | Canada | 29 | Intellectual and developmental disability | Hybrid | Yes | Not clear | Yes |
| Guzick et al. (2023) | USA | 8 | ADHD | Hybrid | Not clear | Yes | Yes |
| Guzick et al. (2024) | USA | 57 | ADHD | Full | Yes | Yes | Yes |
| Hall et al. (2024) | N/A | N/A | Across all conditions | N/A | N/A | N/A | N/A |
| Hartley et al. (2022) | Australia | 16 | Autism | Hybrid | Yes | Not clear | Yes |
| Haun et al. (2023) | USA | 265 dyads | PTSD | Full | Yes | Yes | Yes |
| He et al. (2022) | China | 148 | Depression | Hybrid | Yes | Not clear | Yes |
| Heller et al. (2020) | Netherlands | 159 | Depression and anxiety | Hybrid | Yes | Not clear | Yes |
| Hoffmann et al. (2021) | Denmark | 101 | Anxiety | Full | Yes | Yes | Yes |
| Hollis et al. (2021) | UK | 224 | Tourette’s syndrome | Hybrid | Yes | No | Yes |
| Huberty et al. (2021) | USA | 239 | Insomnia | Full | Yes | Yes | Yes |
| Jamali et al. (2022) | Iran | 43 | Autism | Full | Yes | Yes | Yes |
| Jent et al. (2021) | Spain | 130 | Disruptive behaviour | Hybrid | Not clear | Yes | Yes |
| Kalmbach et al. (2020) | USA | 91 | Insomnia | Full | Yes | Yes | Yes |
| Kandola et al. (2024) | UK | 908 | Depression | Full | Yes | Yes | Yes |
| Kenworthy et al. (2023) | USA | 97 | Autism | Hybrid | Not clear | No | Yes |
| Kwon et al. (2024) | Korea | 74 | ADHD | Hybrid | No | No | Yes |
| Lewis et al. (2024) | Australia | 61 | Autism | Full | Yes | Yes | Yes |
| Lindgren et al. (2020) | USA | 38 | Autism | Hybrid | Not clear | Not clear | Yes |
| Lippke et al. (2021) | Germany | 300 | Psychosomatic diagnosis | Hybrid | No | No | Yes |
| Malarkey et al. (2024) | USA | 125 | Insomnia | Hybrid | Yes | Not clear | Yes |
| March et al. (2023) | Australia | 137 | Anxiety | Hybrid | Not clear | Yes | Yes |
| March et al. (2025) | Australia | 137 | Anxiety | Full | Yes | Yes | Yes |
| McCloud et al. (2020) | UK | 168 | Anxiety and depression | Full | Yes | Yes | Yes |
| McLellan et al. (2024) | Australia | 95 | Anxiety | Hybrid | No | Yes | Yes |
| Mechler et al. (2022) | Sweden | 272 | Depression | Full | Yes | Yes | Yes |
| Moshe et al. (2022) | Germany | 253 | Depression | Hybrid | Yes | Not clear | Yes |
| Murray et al. (2021) | Australia | 302 | Bipolar disorder | Full | Yes | Yes | Yes |
| Nardi et al. (2022) | USA | 27 | Generalised anxiety disorder | Hybrid | Yes | No | Yes |
| Nissling et al. (2023) | Sweden | 52 | Anxiety | Full | Yes | Yes | Yes |
| Nordh et al. (2021) | Sweden | 103 | Social anxiety disorder | Hybrid | Yes | Yes | Not clear |
| Ong et al. (2024) | USA | 178 | PTSD and/or depression | Full | Yes | Yes | Yes |
| Piscitello et al. (2024) | USA | 43 | ADHD | Hybrid | Yes | Yes | Not clear |
| Possemato et al. (2022) | USA | 81 | Depression, anxiety and PTSD | Full | Yes | Yes | Yes |
| Richards et al. (2020) | UK | 361 | Depression and anxiety | Full | Yes | Yes | Yes |
| Sabri et al. (2025) | USA | 144 | PTSD and/or depression | Full | Yes | Yes | Yes |
| Sayal et al. (2025) | UK | 1225 | Emotional difficulties | Hybrid | No | Yes | Yes |
| Segal et al. (2020) | USA | 460 | Depression | Hybrid | Yes | Yes | Not clear |
| Seo et al. (2022) | South Korea | 73 | Postpartum depression | Full | Yes | Yes | Yes |
| Sun et al. (2021) | China | 168 | Perinatal depression | Hybrid | Not clear | Yes | Yes |
| Tan et al. (2023) | Malaysia | 48 | Depression and anxiety | Hybrid | No | No | Yes |
| Tan et al. (2024) | China | 69 | Learning disabilities | Full | Yes | Yes | Yes |
| Wong et al. (2021) | Hong Kong | 79 | Depression | Full | Yes | Yes | Yes |
| Wu et al. (2023) | China | 93 | OCD | Full | Yes | Yes | Yes |

| Table 3. Number of studies (total n=58) reporting PROGRESS-Plus items | |
| --- | --- |
| PROGRESS-Plus item | **Number of studies reporting demographic information n (%)** |
| Place (rural vs urban) | 7 (12.1%) |
| Race/ethnicity | 23 (39.7%) |
| Occupation | 21 (36.2%) |
| Gender | 58 (100%) |
| Religion | 3 (5.2%) |
| Education | 41 (70.7%) |
| Socioeconomic status | 16 (27.6%) |
| Social capital | 25 (43.1%) |
| Age | 58 (100%) |
| Non mental health disability | 1 (1.7%) |

| Table 4. Ethnicity reported across the included studies and separated by countries (represented in ≥2 studies) | | | | | | | |
| --- | --- | --- | --- | --- | --- | --- | --- |
|  | **Total participants (n)** | **White**  **n (%)** | **Asian**  **n (%)** | **Black**  **n (%)** | **Multiple**  **n (%)** | **Other**  **n (%)** | **Missing/not reported**  **n (%)** |
| Across all geographic regions (n = 23*) | 5,381* | 4,054  (75.3%) | 493  (9.2%) | 268  (4.9%) | 152  (2.8%) | 208  (3.9%) | 261  (4.9%) |
| USA (n = 12) | 2,117 | 1,564  (73.9%) | 72  (3.4%) | 224  (10.6%) | 55  (2.6%) | 129  (6.1%) | 128  (6.0%) |
| USA Population Statistics | | 61.6% | 4.8% | 12.4% | 10.2% | 0.1% |  |
| UK (n = 5) | 2,355 | 2,011  (85.4%) | 60  (2.5%) | 18  (0.8%) | 64  (2.7%) | 72  (3.1%) | 130  (5.5%) |
| UK Population Statistics | | 81.7% | 9.3% | 4% | 2.9% | 2.1% |  |
| China (n = 2) | 316 | 0  (0.0%) | 305  (96.5%) | 0  (0.0%) | 0  (0.0%) | 0  (0.0%) | 11  (3.5%) |

*Including four studies that are only represented by one country or combined countries

| Table 5. Occupational status reported across the included studies and separated by countries (represented in ≥2 studies) | | | | |
| --- | --- | --- | --- | --- |
|  | **Total participants**  **(n)** | **Employed**  **n (%)** | **Not employed**  **n (%)** | **Missing/not reported**  **n (%)** |
| Across all geographic regions (n = 21*) | 3,059* | 2,023  (66.1%) | 649  (21.2%) | 387  (12.7%) |
| USA (n = 4) | 693 | 438  (63.2%) | 234  (33.8%) | 21  (3.0%) |
| USA Population Statistics | | 52.7% | 42.8% |  |
| UK (n = 4) | 1,130 | 857  (75.8%) | 174  (15.4%) | 99  (8.8%) |
| UK Population Statistics | | 75.1% | 24.9% |  |
| Sweden (n = 3) | 296 | 129  (43.6%) | 64  (21.6%) | 103  (34.8%) |
| Sweden Population Statistics | | 69% | 31% |  |

*Including 10 studies that are only represented by one country or combined countries

| Table 6. Gender and sex reported across the included studies and separated by countries (represented in ≥2 studies) | | | | | | |
| --- | --- | --- | --- | --- | --- | --- |
|  | **Total participants (n)** | **Females**  **n (%)** | **Males**  **n (%)** | **Non-binary**  **n (%)** | **Other**  **n (%)** | **Missing/not reported**  **n (%)** |
| Across all geographic regions (n = 58*) | 10,401* | 6,685  (64.3%) | 2,691 (25.9%) | 30  (0.3%) | 15  (0.1%) | 980  (9.4%) |
| USA (n = 15) | 2,326 | 1,542  (66.3%) | 765  (32.9%) | 0  (0.0%) | 3  (0.1%) | 16  (0.7%) |
| USA Population Statistics | | 50.5% | 49.5% |  |  |  |
| UK (n = 8) | 3,465 | 2,173  (62.7%) | 700  (20.2%) | 30  (0.9%) | 3  (0.1%) | 559  (16.1%) |
| UK Population Statistics | | 49.6% | 51.4% |  |  |  |
| Australia (n = 7) | 851 | 568  (66.7%) | 271  (31.8%) | 0  (0.0%) | 3  (0.4%) | 9  (1.1%) |
| Australia Population Statistics | | 50.7% | 49.3% |  |  |  |
| Sweden (n = 4) | 568 | 441  (77.6%) | 118  (20.8%) | 0  (0.0%) | 0  (0.0%) | 9  (1.6%) |
| Sweden Population Statistics | | 49.7% | 50.3% |  |  |  |
| China (n = 4) | 478 | 327  (68.4%) | 151  (31.6%) | 0  (0.0%) | 0  (0.0%) | 0  (0.0%) |
| China Population Statistics | | 48.8% | 51.2% |  |  |  |
| Germany (n = 3) | 984 | 740  (75.2%) | 143  (14.5%) | 0  (0.0%) | 0  (0.0%) | 101  (10.3%) |
| Germany Population Statistics | | 50.6% | 49.4% |  |  |  |
| Hong Kong (n = 3) | 449 | 136  (30.3%) | 102  (22.7%) | 0  (0.0%) | 0  (0.0%) | 211  (46.9%) |
| Hong Kong Population Statistics | | 55% | 45% |  |  |  |
| Denmark (n = 2) | 171 | 77  (45.0%) | 94  (55.0% | 0  (0.0%) | 0  (0.0%) | 0  (0.0%) |
| Denmark Population Statistics | | 50.3% | 49.8% |  |  |  |
| Spain (n = 2) | 179 | 6  (3.4%) | 92  (51.3%) | 0  (0.0%) | 0  (0.0%) | 81  (45.3%) |
| Spain Population Statistics | | 50.9% | 49.1% |  |  |  |

*Including 10 studies that are only represented by one country or combined countries

| Table 7. Educational data reported across the included studies and separated by countries (represented in ≥2 studies) | | | | |
| --- | --- | --- | --- | --- |
|  | **Total participants**  **(n)** | **Compulsory**  **n (%)** | **Higher**  **n (%)** | **Missing/not reported**  **n (%)** |
| Across all geographic regions (n = 38*) | 5,698 | 1,185  (20.8%) | 4,310  (75.6%) | 203  (3.6%) |
| USA (n = 10) | 1,683 | 152  (9.0%) | 1,461  (86.8%) | 70  (4.2%) |
| USA Populations Statistics | | 39% | 61% |  |
| UK (n = 4) | 937 | 141  (15.0%) | 796  (85.0%) | 0  (0.0%) |
| UK Population Statistics | | 66% | 33.8% |  |
| Australia (n = 4) | 275 | 26  (9.5%) | 249  (90.5%) | 0  (0.0%) |
| Australia Population Statistics | | 16% | 84% |  |
| Germany (n = 3) | 984 | 602  (61.2%) | 377  (38.3%) | 5  (0.5%) |
| Germany Population Statistics | | 63% | 37% |  |
| Hong Kong (n = 3) | 449 | 33  (7.3%) | 389  (86.6%) | 27  (6.1%) |
| Hong Kong Population Statistics | | 59% | 41% |  |
| Sweden (n = 3) | 296 | 138  (46.6%) | 94  (31.8%) | 64  (21.6%) |
| Sweden Population Statistics | | 60% | 40% |  |
| China (n = 2) | 217 | 2  (0.9%) | 215  (99.1%) | 0  (0.0%) |
| China Population Statistics | | 39% | 61% |  |

*Including 9 studies that are only represented by one country or combined countries

| **Table 8**. Socioeconomic status as calculated based on area of deprivation status or income reported across the included studies and separated by countries (represented in ≥2 studies) | | | | | |
| --- | --- | --- | --- | --- | --- |
|  | **Total Participants (n)** | **Low**  **n (%)** | **Middle n (%)** | **High**  **n (%)** | **Missing/not reported n (%)** |
| **Across all geographic regions (n = 19*)** | 3798 | 1087 (28.6%) | 1203 (31.7%) | 999  (26.3%) | 509  (13.4%) |
| **Australia (n = 5)** | 533 | 121  (22.7%) | 201 (37.7%) | 178  (33.4%) | 33  (6.2%) |
| **China (n = 2)** | 237 | 84  (35.4%) | 107 (45.1%) | 30  (12.7%) | 16  (6.7%) |
| **Hong Kong (n = 2)** | 129 | 65  (50.4%) | 35  (27.1%) | 36  (12.7%) | 23  (6.8%) |
| **UK (n = 2)** | 1668 | 539 (32.3%) | 330 (19.8%) | 629  (37.7%) | 170  (10.2%) |
| **USA (n = 5)** | 829 | 88  (10.6%) | 468 (56.4%) | 124  (15%) | 149  (17.8%) |

*Including 3 studies that are only represented by one country

| **Table 9.** Number and % living in poverty represented in the sample | | |
| --- | --- | --- |
| **Author** | **Country** | **n (%) in poverty** |
| **March 2025** | Australia | 15  (10.9%) |
| **March 2023** | Australia | 12  (8.7%) |
| **Andrews 2023** | Australia | 15  (14.5%) |
| **Total** | Australia | 42 (11.1%) |
| **Australia Population Statistics** | | 13.4% |
| **Wong 2021** | Hong Kong | 39  (49.3%) |
| **Hong Kong Population Statistics** | | 20.2% |
| **Creswell 2024** | UK | 35  (7.9%) |
| **Sayal 2025** | UK | 214  (17.4%) |
| **Total** | UK | 249 (14.9%) |
| **UK Population Statistics** | | 15% |
| **Kalmbach** | USA | 16  (17.5%) |
| **USA Population Statistics** | | 11.4% |

| Table 10. Social capital reported across the included studies and separated by countries (represented in ≥2 studies) | | | | | | |
| --- | --- | --- | --- | --- | --- | --- |
|  | **Total participants (n)** | **Married, civil partnership or relationship**  **(n, %)** | **Never married or single**  **(n, %)** | **Divorced, separated or widowed**  **(n, %)** | **Prefer not to say**  **(n, %)** | **Missing/not reported**  **(n, %)** |
| Across all geographic regions (n = 21*) | 3,531 | 2,106  (59.6%) | 470  (13.3%) | 300  (8.5%) | 2  (0.1%) | 663  (18.5%) |
| USA (n = 6) | 1,201 | 765  (63.7%) | 175  (14.6%) | 233  (19.4%) | 0  (0.0%) | 28  (2.3%) |
| USA Marriage Population Statistics | | 49.4% |  |  |  |  |
| China (n = 3) | 330 | 285  (86.4%) | 37  (11.2%) | 4  (1.2%) | 0  (0.0%) | 4  (1.2%) |
| Hong Kong (n = 3) | 449 | 89  (19.8%) | 59  (13.1%) | 2  (0.4%) | 0  (0.0%) | 299  (66.6%) |
| UK (n = 2) | 545 | 408  (74.9%) | 0  (0.0%) | 0  (0.0%) | 0  (0.0%) | 137  (25.1%) |
| UK Marriage Population Statistics | | 46.9% |  |  |  |  |
| Germany (n = 2) | 553 | 337  (60.9%) | 34  (6.1%) | 39  (7.1%) | 0  (0.0%) | 143  (25.9%) |
| Germany Marriage Population Statistics | | 51% |  |  |  |  |
| *Including 5 studies that are only represented by one country or combined countries | | | | | | |
